# Supplementary material for: Reducing the barrier effect of graphene sheets on a Ag cocatalyst to further improve the photocatalytic performance of TiO2
Source: Royal Society of Chemistry journal article supplement (doi:10.1039/c8ra02268b), 2018-01-01
Supplement: c8ra02268b1.pdf [file c8ra02268b1.pdf]

Reducing the barrier effect of graphene sheets on Ag cocatalyst to further  
improve the photocatalysis performance of TiO<sub>2</sub>

Juanjuan Ma,<sup>a</sup> Chaocun Zhou,<sup>a</sup> Jinlin Long,<sup>a</sup> Zhengxin Ding,<sup>a</sup> Rusheng Yuan,<sup>a</sup> Chao

Xu<sup>a</sup>

<sup>a</sup> State Key Laboratory of Photocatalysis on Energy and Environment, College of  
Chemistry, Fuzhou University, Fuzhou 350002, P. R. China.

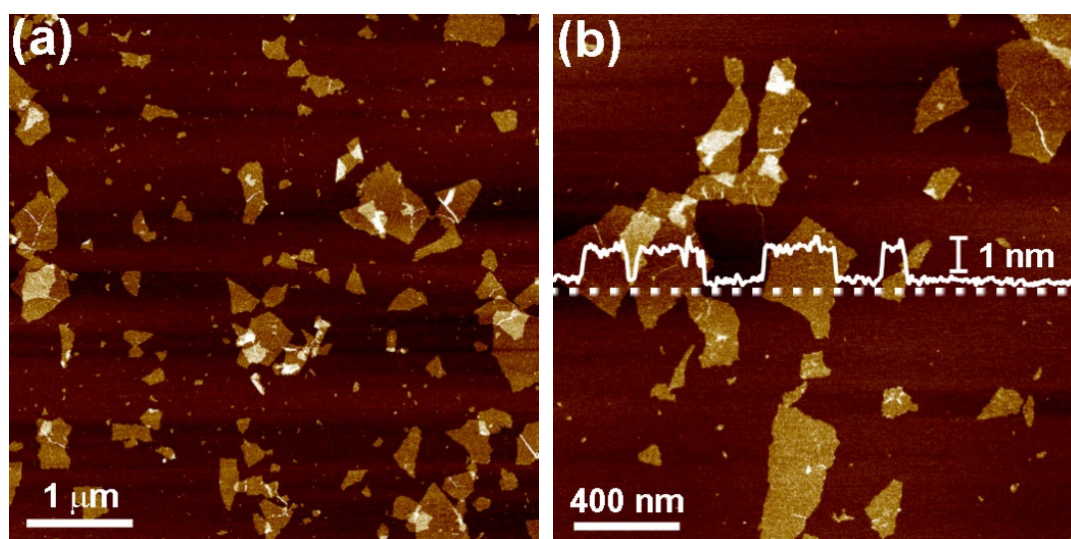

Fig. S1. AFM images of small GO sheets. White curve in Figure (b) is the height profile taken along the dotted line (scale bar, 1 nm). Samples were prepared by drop-casting dilute GO sheet dispersions onto mica plates.

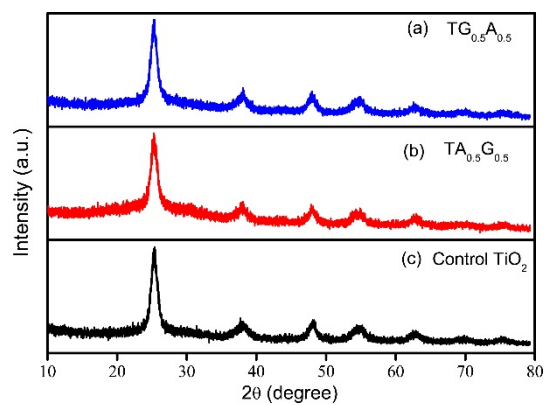

Fig.S2. XRD patterns of samples. (a)  $TG_{0.5}A_{0.5}$ , (b)  $TA_{0.5}G_{0.5}$  and (c) control  $TiO_2$  spheres

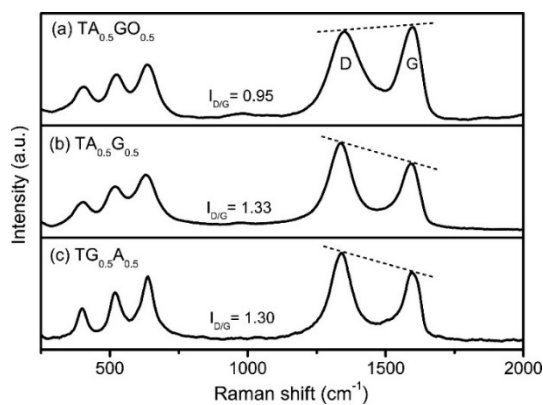

Fig. S3. Raman spectra of samples. (a)  $TA_{0.5}GO_{0.5}$ , (b)  $TA_{0.5}G_{0.5}$  and (c)  $TG_{0.5}A_{0.5}$

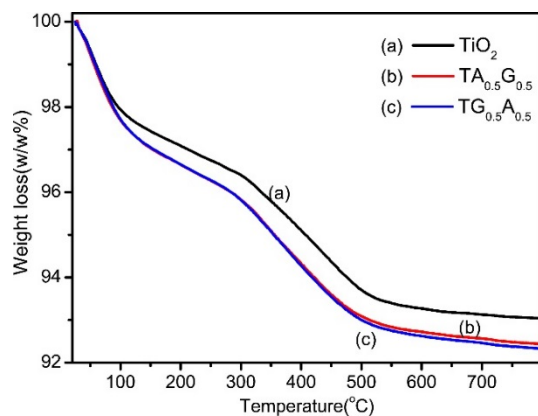

Fig. S4. Thermogravimetric analysis of (a)  $TiO_2$ , (b)  $TA_{0.5}G_{0.5}$  and (c)  $TG_{0.5}A_{0.5}$  samples

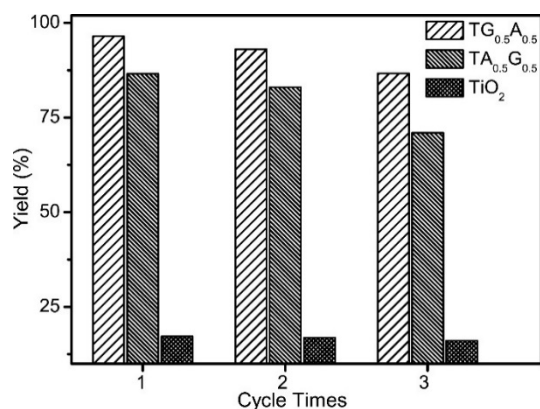

Fig. S5. Yields of 4-aminophenol of recycle experiments using TG<sub>0.5</sub>A<sub>0.5</sub>, TA<sub>0.5</sub>G<sub>0.5</sub> and TiO<sub>2</sub> as photocatalysts.

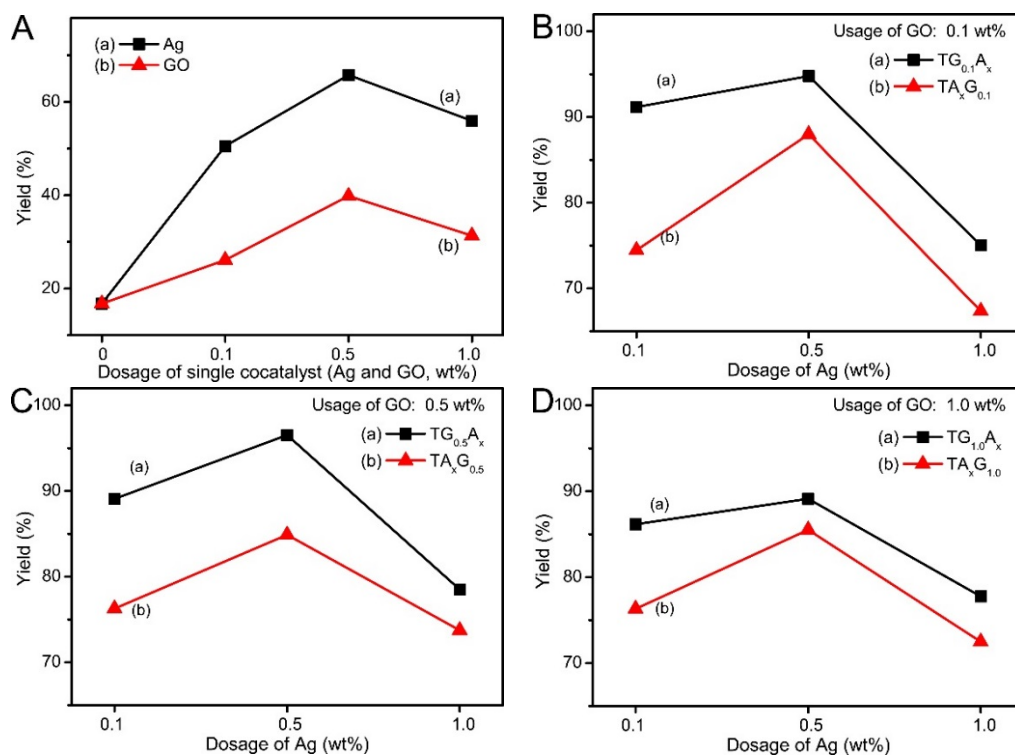

Fig. S6. Yields of 4-aminophenol using different composites. (A) TiO<sub>2</sub> with different dosage of single cocatalyst (a) Ag nanoparticles and (b) graphene; (B-D) The usage of GO sheets in each figure is fixed, which is 0.1, 0.5 and 1.0 wt % in (B), (C) and (D) respectively. While the dosage of Ag is adjusted from 0.1 to 1.0 wt % in two kinds of ternary composites: (a) TGA and (b) TAG samples.
